# Supplementary material for: Behavioral barriers in the inclusion of neglected and underutilized species into mainstream diets
Source: Frontiers journal article supplement (doi:10.3389/fsufs.2025.1623138), 2025-01-01
Supplement: Table_1.docx [file Table_1.docx]

Appendix A

Table A1. List of species included in the reviewed articles

| **Study** | **List of species** |
| --- | --- |
| Van Loon et al., 2021 | Feijoa (Acca sellowiana); Cherimoya, Custard apple (Annona cherimola); Soursop, Guanábana, Graviola (Annona muricata); Sugar Apple, Atemoya (Annona squamosa, A. squamosa x A. cherimola); Brazil nut, Castaña (Bertholletia excelsa); Manchinga, Ramón, Maya Nut (Brosimum alicastrum); Metohuayo, Cacay, Inchi, Tacay, Nogal (Caryodendron orinocense); Pisonay, Porotón (Erythrina edulis); Arazá (Eugenia stipitata); Suriname Cherry, Pitanga (Eugenia uniflora); Huasaí (Euterpe precatoria); Charichuelo, Achachairú (Garcinia humilis, G. madruno, G. macrophylla, Garcinia sp.); Sacha Mangua (Grias peruviana); Inga, Guaba Ilta (Inga ilta); Aguaje, Burití (Mauritia flexuosa); Camu Camu (Myrciaria dubia); Ungurahui, Patauá (Oenocarpus bataua); Lucuma (Pouteria lucuma); Algarrobo, Huarango, Peruvian Mesquite (Prosopis flexuosa, P. pallida); Copoazú (Theobroma grandiflorum) |
| Verner et al., 2023 | Kramsang (Green fruit of the wood apple tree [Citrus lucida (Scheff.) Mabb.]), Ma-om (Rice paddy herb [Limnophila aromatica (Lam.) Merr.]), Maprang (the orange or yellow fruit of the mango plum (Bouea macrophylla Griff.)), Samraong (a beverage made from the Malva nut tree [Scaphium affine (Mast.) Pierre]), wild grape winered (wine made from wild grapes (fruits of Ampelocissus martini Planch.)) |
| Knez et al., 2023 | Buckwheat (Triticum aestivum L.), sow thistle (Sonchus oleraceus L.), grass pea (Lathyrus sativus L.), eggplant (the African eggplant (S. macrocarpon L.) and the scarlet eggplant (S. aethiopicum L.)), snake melon (Cucumis melo var. flexuosus (L.) Naud.), lentil (Lens culinaris Medic.) and indigenous green leafy vegetables |
| Pieterse et al., 2023 | Aponogeton distachyos |
